# Supplementary material for: Objectively measured physical activity, sedentary time and subclinical vascular disease: Cross-sectional study in older British men
Source: PubMed Central journal article supplement (PMC4976831; doi:10.1016/j.ypmed.2016.05.031), 2016-08
Supplement: mmc1.pdf [file mmc1.pdf]

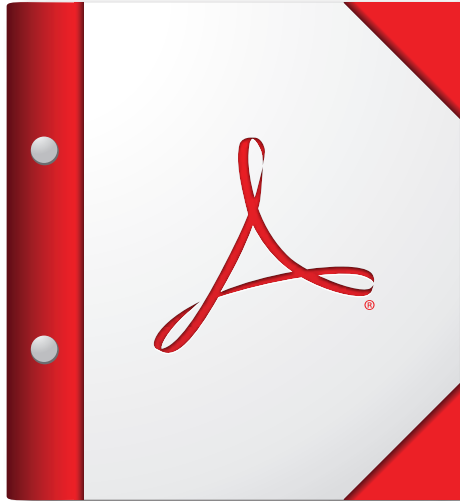

**For the best experience, open this PDF portfolio in  
Acrobat 9 or Adobe Reader 9, or later.**

[Get Adobe Reader Now!](#)
